# Supplementary material for: The FDA-Approved Drug Cobicistat Synergizes with Remdesivir To Inhibit SARS-CoV-2 Replication In Vitro and Decreases Viral Titers and Disease Progression in Syrian Hamsters
Source: PubMed Central journal article supplement (PMC8941859; doi:10.1128/mbio.03705-21), 2022-03-01

**A**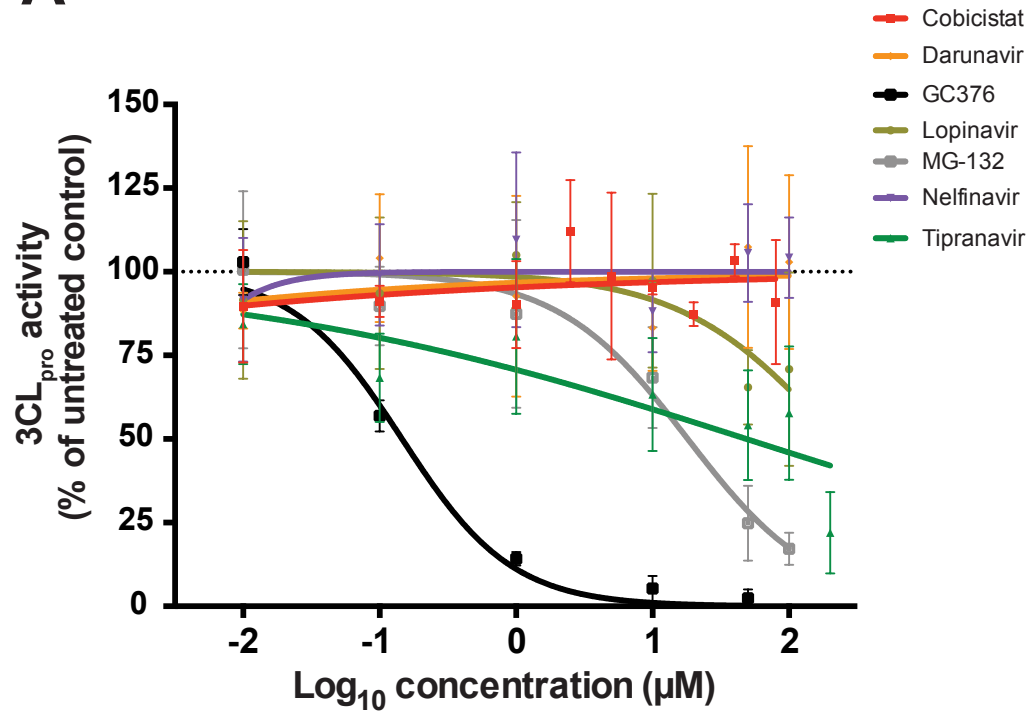**B**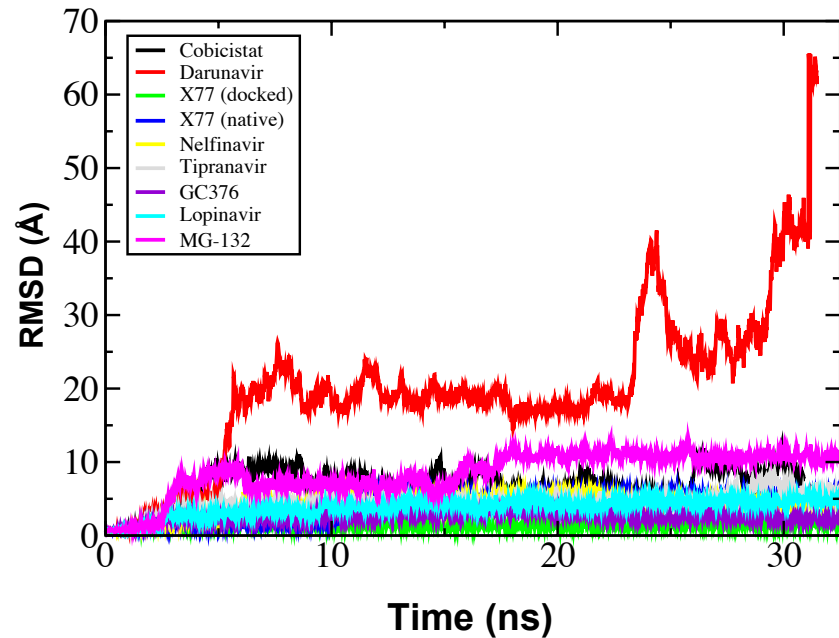

Supplement: mbio.03705-21-sf003.pdf [file mbio.03705-21-sf003.pdf]
