# Supplementary material for: The FDA-Approved Drug Cobicistat Synergizes with Remdesivir To Inhibit SARS-CoV-2 Replication In Vitro and Decreases Viral Titers and Disease Progression in Syrian Hamsters
Source: PubMed Central journal article supplement (PMC8941859; doi:10.1128/mbio.03705-21), 2022-03-01
Supplement: mbio.03705-21-sf005.pdf [file mbio.03705-21-sf005.pdf]

**A**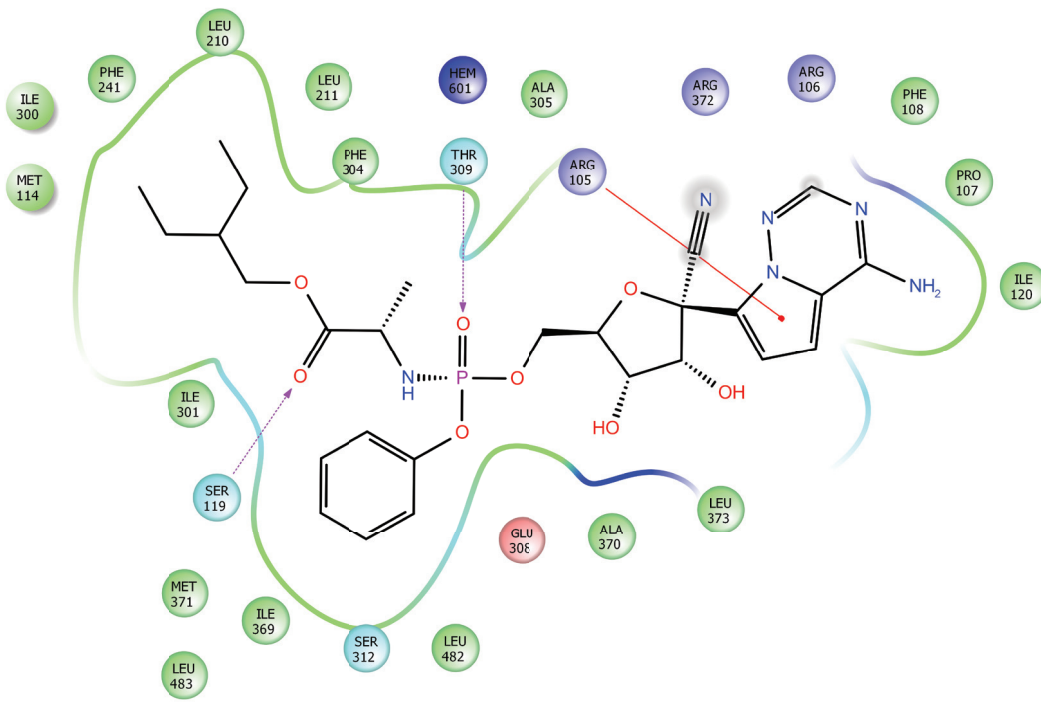**CYP3A4**

**docking score**  
 remdesivir: -10.8  
 cobicistat: -10.3  
 ritonavir: -8.9

**B**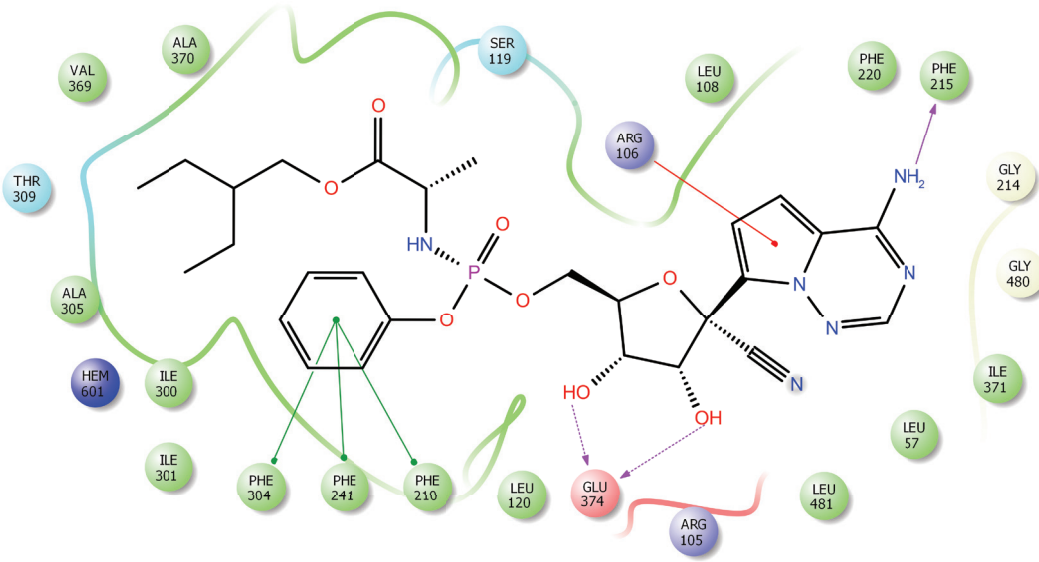**CYP3A5**

**docking score**  
 remdesivir: -9.1  
 cobicistat: -12.2  
 ritonavir: -11.0

**C**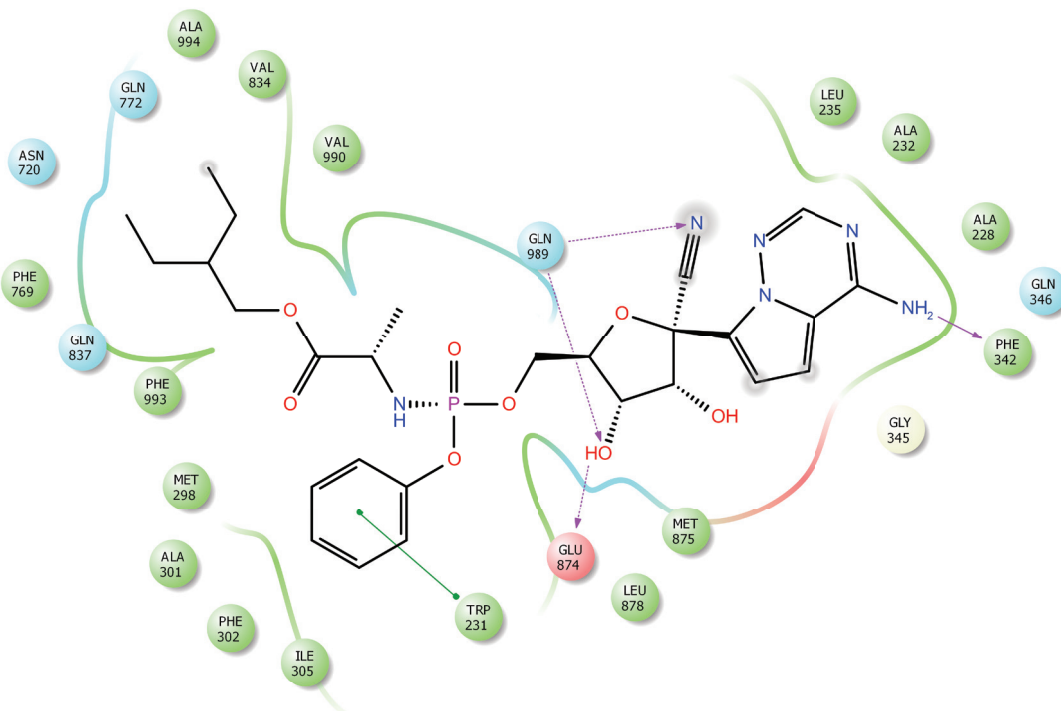**P-gp**

**docking score**  
 remdesivir: -9.8  
 cobicistat: -11.4  
 ritonavir: -8.9
