# Supplementary material for: The FDA-Approved Drug Cobicistat Synergizes with Remdesivir To Inhibit SARS-CoV-2 Replication In Vitro and Decreases Viral Titers and Disease Progression in Syrian Hamsters
Source: PubMed Central journal article supplement (PMC8941859; doi:10.1128/mbio.03705-21), 2022-03-01

A

**Dataset:** 36 anatomical parts from data selection: HS\_AFFY\_U133PLUS\_2-1  
 Showing 3 measure(s) of 3 gene(s) on selection: HS-0

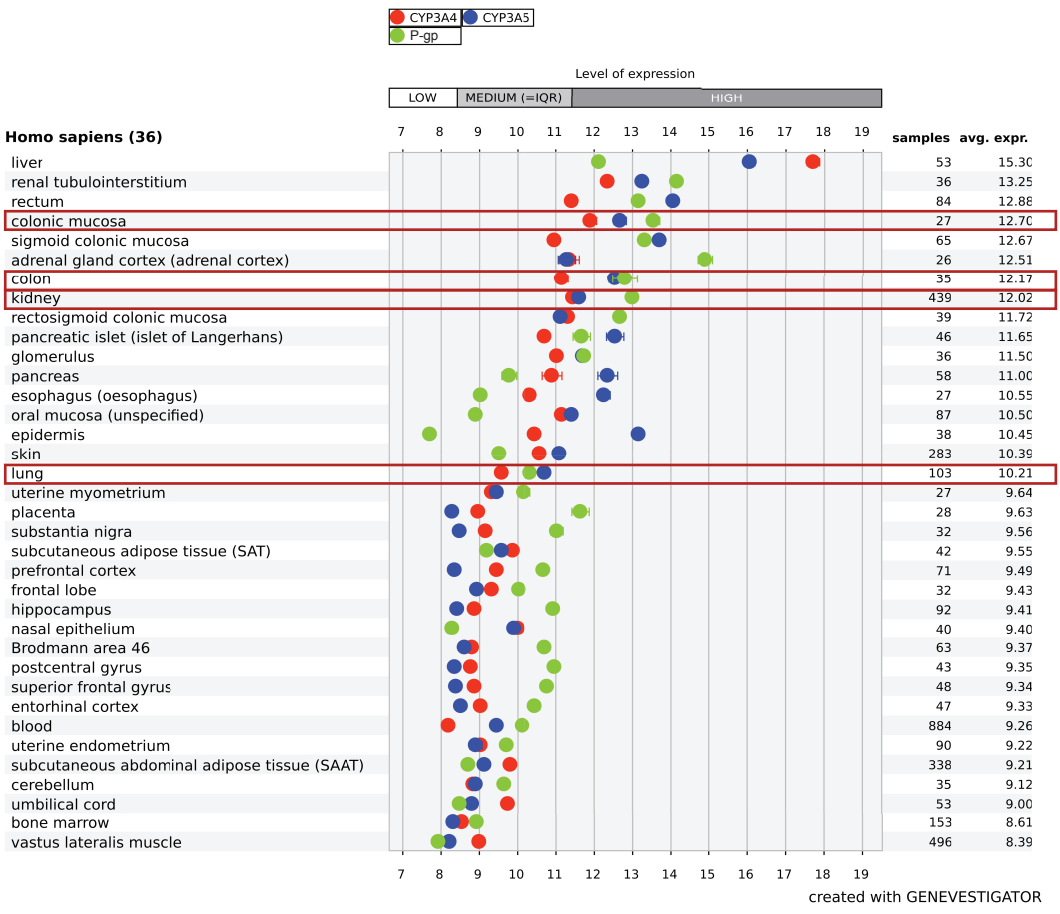

B

**Dataset:** 9 cell lines from data selection: HS\_mRNASeq\_HUMAN\_GL-1  
 Showing 3 measure(s) of 3 gene(s) on selection: HS-0

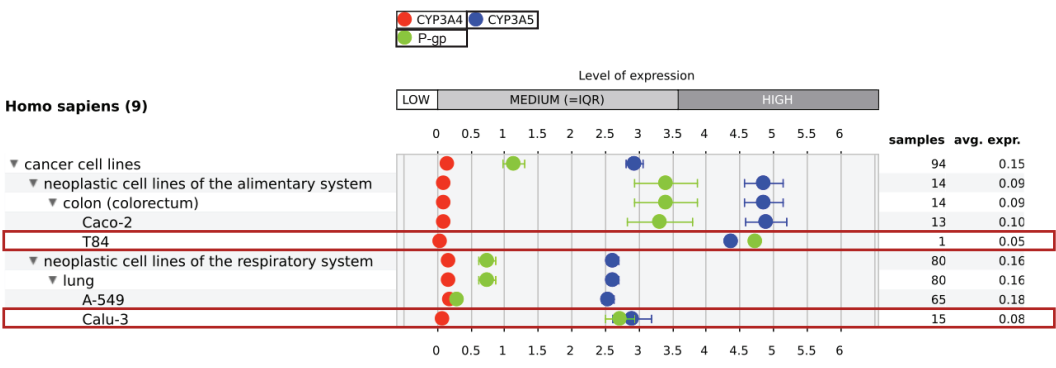

C

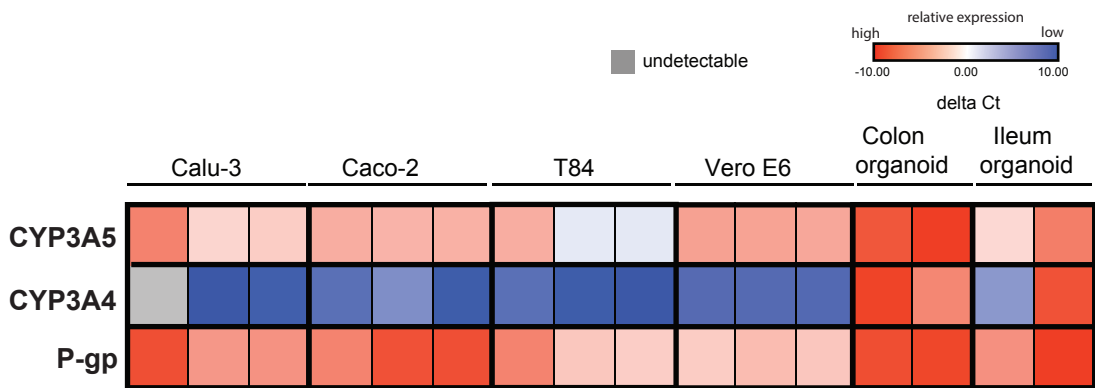

Supplement: mbio.03705-21-sf007.pdf [file mbio.03705-21-sf007.pdf]
